# Supplementary material
Source: publisher figshare collection journal article supplement (https://acs.figshare.com/ndownloader/files/5197531)
Supplement: Supplementary file 1 [file 5197531]

# Supporting Information

## P(RNCH<sub>2</sub>CH<sub>2</sub>)<sub>3</sub>N: Catalysts for the Head-to-tail Dimerization of Methyl Acrylate

Weiping Su, Dale McLeod and John G. Verkade\*

*Department of Chemistry, Iowa State University, Ames, Iowa 50011, USA*

*jverkade@iastate.edu*

### General Experimental

All reactions were performed under an argon atmosphere using standard Schlenk techniques. 1,4-Dioxane (anhydrous, Sure-seal; Aldrich) was used as received. THF and pentane were distilled from sodium-benzophenone ketyl prior to use and methyl acrylate (Aldrich) was distilled from active molecular sieves under vacuum prior to use. Proazaphosphatranes were prepared according to our previously reported procedures (see reference 7 in the manuscript) although **3a-c** are commercially available (Aldrich, Strem).
